# Supplementary material for: What Is the Role of Resilience and Coping Strategies on the Mental Health of the General Population during the COVID-19 Pandemic? Results from the Italian Multicentric COMET Study
Source: MDPI journal article supplement (doi:10.3390/brainsci11091231), 2021-09-17
Supplement: s1 [file s1]

Supplementary Material. Table S1. Impact of coping strategies and resilience on mental health status, adjusted for interaction terms

|                                                                | DASS stress |       |                                     |             | DASS Anxiety |       |                                     |             | DASS Depression |       |                                     |             |
|----------------------------------------------------------------|-------------|-------|-------------------------------------|-------------|--------------|-------|-------------------------------------|-------------|-----------------|-------|-------------------------------------|-------------|
|                                                                | B           | Sign. | 95% Confidence Interval Lower bound | Upper bound | B            | Sign. | 95% Confidence Interval Lower bound | Upper bound | B               | Sign. | 95% Confidence Interval Lower bound | Upper bound |
| <b>Intercept</b>                                               | 18.927      | .000  | 16.524                              | 21.330      | 10.573       | .000  | 8.609                               | 12.538      | 16.328          | .000  | 13.878                              | 18.779      |
| COPE Active coping                                             | -.002       | .975  | -.159                               | .154        | .032         | .668  | -.114                               | .178        | -.055           | .508  | -.219                               | .108        |
| COPE Denial                                                    | .035        | .662  | -.121                               | .191        | .078         | .293  | -.067                               | .223        | .010            | .900  | -.152                               | .173        |
| COPE Substance abuse                                           | .048        | .604  | -.134                               | .231        | .100         | .248  | -.070                               | .271        | .063            | .516  | -.128                               | .254        |
| COPE Emotional support                                         | .094        | .312  | -.089                               | .277        | -.059        | .500  | -.229                               | .112        | .044            | .653  | -.147                               | .235        |
| COPE Practical support                                         | -.203       | .519  | -.818                               | .413        | .005         | .957  | -.167                               | .177        | -.080           | .417  | -.273                               | .113        |
| COPE Emotional disengagement                                   | .134        | .119  | -.034                               | .303        | .073         | .362  | -.084                               | .230        | .104            | .246  | -.072                               | .280        |
| COPE Venting                                                   | .094        | .234  | -.061                               | .250        | .086         | .245  | -.059                               | .231        | .088            | .288  | -.074                               | .250        |
| COPE Reframing                                                 | -.095       | .204  | -.241                               | .052        | .122         | .079  | -.014                               | .258        | -.058           | .453  | -.211                               | .094        |
| COPE Planning                                                  | .015        | .962  | -.603                               | .633        | .122         | .136  | -.038                               | .282        | .115            | .210  | -.064                               | .294        |
| COPE Humor                                                     | .083        | .248  | -.058                               | .224        | .126         | .060  | -.005                               | .257        | -.018           | .807  | -.166                               | .129        |
| COPE Acceptance                                                | -.076       | .350  | -.234                               | .083        | -.140        | .063  | -.287                               | .008        | -.002           | .978  | -.168                               | .163        |
| COPE Religion                                                  | .031        | .627  | -.095                               | .157        | .000         | .999  | -.117                               | .117        | -.020           | .762  | -.151                               | .111        |
| COPE Self-blame                                                | -.078       | .287  | -.220                               | .065        | .014         | .834  | -.119                               | .147        | -.025           | .740  | -.174                               | .124        |
| COPE Self-distraction                                          | .102        | .132  | -.031                               | .235        | -.481        | .068  | -.997                               | .035        | -.188           | .602  | -.892                               | .517        |
| Resilience levels                                              | .000        | .985  | -.012                               | .012        | -.010        | .077  | -.021                               | .001        | -.008           | .235  | -.020                               | .005        |
| Gender, ref. male                                              | 2.061       | .000  | 1.849                               | 2.272       | 2.086        | .000  | 1.889                               | 2.283       | 1.693           | .000  | 1.471                               | 1.914       |
| Age                                                            | -.056       | .000  | -.063                               | -.049       | -.062        | .000  | -.069                               | -.055       | -.052           | .000  | -.059                               | -.044       |
| Quarantine, yes                                                | -.236       | .549  | -1.008                              | .536        | -.220        | .548  | -.940                               | .499        | -1.067          | .009  | -1.873                              | -.262       |
| Being infected by COVID, yes                                   | .261        | .441  | -.402                               | .923        | 1.475        | .044  | .038                                | 2.911       | 1.448           | .000  | .757                                | 2.139       |
| Healthcare professional, yes                                   | .215        | .565  | -.516                               | .945        | -.184        | .891  | -.633                               | .728        | -.184           | .637  | -.946                               | .579        |
| Mental disorder, yes                                           | .670        | .094  | -.115                               | 1.454       | 5.067        | .000  | 3.626                               | 6.509       | 4.527           | .000  | 2.912                               | 6.142       |
| Pre-existing physical condition, yes                           | .787        | .000  | .504                                | 1.707       | 1.490        | .000  | 1.227                               | 1.754       | .995            | .000  | .699                                | 1.269       |
| Employed, yes                                                  | -.144       | .756  | -1.055                              | .766        | .409         | .227  | -.255                               | 1.072       | 1.227           | .001  | .485                                | 1.970       |
| Lost job, yes                                                  | -.987       | .255  | -2.685                              | .712        | -2.323       | .000  | -3.565                              | -1.081      | -2.811          | .000  | -4.203                              | -1.419      |
| Time to exposure, ref. week March 30 – April 8                 |             |       |                                     |             |              |       |                                     |             |                 |       |                                     |             |
| Week April 15 – April 9                                        | 1.645       | .000  | .869                                | 2.421       | 2.435        | .000  | 1.712                               | 3.157       | 1.639           | .000  | .829                                | 2.448       |
| Week April 16- April 22                                        | 1.522       | .000  | .939                                | 2.104       | 1.846        | .000  | 1.304                               | 2.388       | 1.484           | .000  | .876                                | 2.092       |
| Week April 23 – April 29                                       | .936        | .000  | .431                                | 1.440       | 1.005        | .000  | .535                                | 1.474       | .806            | .003  | .280                                | 1.332       |
| Week April 30 – May 4                                          | .351        | .040  | .017                                | .686        | .343         | .031  | .031                                | .654        | .388            | .029  | .039                                | .737        |
| PTGI - Relating to others                                      | .080        | .124  | -.022                               | .181        | .084         | .080  | -.010                               | .179        | .050            | .358  | -.056                               | .156        |
| PTGI - New possibilities                                       | -.005       | .934  | -.113                               | .104        | -.098        | .057  | -.199                               | .003        | -.057           | .321  | -.170                               | .056        |
| PTGI - Personal strenght                                       | -.069       | .299  | -.198                               | .061        | -.127        | .039  | -.248                               | -.007       | -.065           | .349  | -.200                               | .071        |
| PTGI - Spiritual help                                          | -.014       | .764  | -.107                               | .079        | .022         | .620  | -.065                               | .108        | .022            | .660  | -.075                               | .119        |
| PTGI - Appreciation life                                       | .006        | .930  | -.122                               | .134        | .201         | .001  | .082                                | .320        | .218            | .001  | .084                                | .352        |
| Support from others                                            | .011        | .245  | -.008                               | .030        | .011         | .220  | -.006                               | .028        | -.010           | .321  | -.029                               | .010        |
| Support from friends                                           | -.011       | .260  | -.030                               | .008        | -.017        | .060  | -.034                               | .001        | -.022           | .030  | -.041                               | -.002       |
| Support from family                                            | -.009       | .321  | -.027                               | .009        | -.008        | .360  | -.025                               | .009        | -.007           | .484  | -.026                               | .012        |
| UCLA Loneliness                                                | .011        | .517  | -.023                               | .045        | .010         | .542  | -.022                               | .041        | .050            | .354  | -.056                               | .156        |
| Cases COVID                                                    | .000        | .101  | -.000                               | .001        | .000         | .109  | 6.4815                              | .000        | .000            | .335  | 1.705                               | .000        |
| Death COVID                                                    | .000        | .624  | -.002                               | .001        | .002         | .108  | -.000                               | .003        | .001            | .373  | -.001                               | .002        |
| <b>Interaction terms</b>                                       |             |       |                                     |             |              |       |                                     |             |                 |       |                                     |             |
| Pre-existing physical condition * COPE practical support       | .007        | .969  | -.343                               | .357        | -            | -     | -                                   | -           | -               | -     | -                                   | -           |
| Employment * COPE practical support                            | -.081       | .550  | -.346                               | .184        | -            | -     | -                                   | -           | -               | -     | -                                   | -           |
| Lost job * COPE practical support                              | .039        | .886  | -.488                               | .566        | -            | -     | -                                   | -           | -               | -     | -                                   | -           |
| Lost job * COPE planning                                       | .066        | .809  | -.466                               | .597        | -            | -     | -                                   | -           | -               | -     | -                                   | -           |
| Employment * COPE planning                                     | .024        | .863  | -.253                               | .301        | -            | -     | -                                   | -           | -               | -     | -                                   | -           |
| Pre-existing physical condition* COPE planning                 | .154        | .400  | -.205                               | .513        | -            | -     | -                                   | -           | -               | -     | -                                   | -           |
| Employment * COPE Emotional disengagement                      | -           | -     | -                                   | -           | .077         | .520  | -.158                               | .313        | -               | -     | -                                   | -           |
| Lost job * COPE Emotional disengagement                        | -           | -     | -                                   | -           | .412         | .068  | -.031                               | .854        | .216            | .394  | -.280                               | .712        |
| Pre-existing mental disorder * COPE Emotional disengagement    | -           | -     | -                                   | -           | -.197        | .402  | -.660                               | .265        | -.244           | .357  | -.762                               | .274        |
| Pre-existing physical condition * COPE Emotional disengagement | -           | -     | -                                   | -           | .285         | .068  | -.021                               | .591        | .225            | .197  | -.117                               | .568        |
| Being infected by COVID * COPE Emotional disengagement         | -           | -     | -                                   | -           | .027         | .912  | -.453                               | .507        | -               | -     | -                                   | -           |
| Employment * COPE Emotional disengagement                      | -           | -     | -                                   | -           | -            | -     | -                                   | -           | .037            | .781  | -.226                               | .301        |

|                                                |                         |                     |  |                     |  |  |  |       |                     |        |      |
|------------------------------------------------|-------------------------|---------------------|--|---------------------|--|--|--|-------|---------------------|--------|------|
| COPE Emotional disengagement * UCLA loneliness |                         |                     |  |                     |  |  |  | -0.02 | .913                | -0.039 | .035 |
| <b>Model statistics</b>                        |                         |                     |  |                     |  |  |  |       |                     |        |      |
|                                                | F (df), p value         | 17.618 (45), p<.001 |  | 43.015 (44), p<.000 |  |  |  |       | 30.865 (44), p<.001 |        |      |
|                                                | Adjusted R <sup>2</sup> | .035                |  | .082                |  |  |  |       | .060                |        |      |

DASS, Depression, Anxiety and Stress scale; PTGI, Post-Traumatic Growth Inventory; UCLA, Ucla loneliness scale; COPE, Brief – COPE scale; B, Beta coefficient  
Significant p-values are highlighted in bold characters
